# Supplementary material for: Effect of PM2.5 Levels on ED Visits for Respiratory Causes in a Greek Semi-Urban Area
Source: MDPI journal article supplement (doi:10.3390/jpm12111849), 2022-11-05
Supplement: s1 [file s1]

Supplementary: Table S1

| URI    | PM <sub>2.5</sub> Level            | Total Days | Number of ED Visits | Mean ED Visits/Day $\pm$ SD | % Increase in Mean ED Visits | P value |
|--------|------------------------------------|------------|---------------------|-----------------------------|------------------------------|---------|
| Winter | <25 $\mu\text{g}/\text{m}^3$       | 18         | 15                  | 0.83 $\pm$ 0.92             | 51.23%                       | 0.22    |
|        | $\geq$ 25 $\mu\text{g}/\text{m}^3$ | 73         | 92                  | 1.26 $\pm$ 1.05             |                              |         |
| Spring | <25 $\mu\text{g}/\text{m}^3$       | 42         | 36                  | 0.86 $\pm$ 1.12             | -16.00%                      | 0.54    |
|        | $\geq$ 25 $\mu\text{g}/\text{m}^3$ | 50         | 36                  | 0.72 $\pm$ 1.03             |                              |         |
| Summer | <25 $\mu\text{g}/\text{m}^3$       | 74         | 38                  | 0.51 $\pm$ 1.01             | 19.01%                       | 0.70    |
|        | $\geq$ 25 $\mu\text{g}/\text{m}^3$ | 18         | 11                  | 0.61 $\pm$ 0.70             |                              |         |
| Autumn | <25 $\mu\text{g}/\text{m}^3$       | 54         | 45                  | 0.83 $\pm$ 1.01             | 20.00%                       | 0.44    |
|        | $\geq$ 25 $\mu\text{g}/\text{m}^3$ | 37         | 37                  | 1.00 $\pm$ 1.00             |                              |         |

Table S2

| Pneumonia | PM <sub>2.5</sub> Level | Total Days | Number of ED Visits | Mean ED Visits/Day±SD | % Increase in Mean ED Visits | P value |
|-----------|-------------------------|------------|---------------------|-----------------------|------------------------------|---------|
| Winter    | <25 µg/m <sup>3</sup>   | 18         | 7                   | 0.39±0.50             | 76.13%                       | 0.85    |
|           | ≥25 µg/m <sup>3</sup>   | 73         | 50                  | 0.68±0.98             |                              |         |
| Spring    | <25 µg/m <sup>3</sup>   | 42         | 33                  | 0.79±1.28             | -5.82%                       | 0.85    |
|           | ≥25 µg/m <sup>3</sup>   | 50         | 37                  | 0.74±1.03             |                              |         |
| Summer    | <25 µg/m <sup>3</sup>   | 74         | 28                  | 0.38±0.74             | -26.59%                      | 0.61    |
|           | ≥25 µg/m <sup>3</sup>   | 18         | 5                   | 0.28±0.75             |                              |         |
| Autumn    | <25 µg/m <sup>3</sup>   | 54         | 25                  | 0.46±0.86             | -0.76%                       | 0.98    |
|           | ≥25 µg/m <sup>3</sup>   | 37         | 17                  | 0.46±0.77             |                              |         |

Table S3

| Asthma exacerbation | PM <sub>2.5</sub> Level | Total Days | Number of ED Visits | Mean ED Visits/Day±SD | % Increase in Mean ED Visits | P value |
|---------------------|-------------------------|------------|---------------------|-----------------------|------------------------------|---------|
| Winter              | <25 µg/m <sup>3</sup>   | 18         | 1                   | 0.06±0.24             | 23.29%                       | 0.50    |
|                     | ≥25 µg/m <sup>3</sup>   | 73         | 5                   | 0.07±1.25             |                              |         |
| Spring              | <25 µg/m <sup>3</sup>   | 42         | 15                  | 0.36±0.62             | -38.40%                      | 0.23    |
|                     | ≥25 µg/m <sup>3</sup>   | 50         | 11                  | 0.22±0.47             |                              |         |
| Summer              | <25 µg/m <sup>3</sup>   | 74         | 8                   | 0.11±0.39             | -48.61%                      | 0.59    |
|                     | ≥25 µg/m <sup>3</sup>   | 18         | 1                   | 0.06±0.24             |                              |         |
| Autumn              | <25 µg/m <sup>3</sup>   | 54         | 6                   | 0.11±0.32             | 45.95%                       | 0.49    |
|                     | ≥25 µg/m <sup>3</sup>   | 37         | 6                   | 0.16±0.37             |                              |         |

Table S4

| COPD exacerbation | PM <sub>2.5</sub> Level | Total Days | Number of ED Visits | Mean ED Visits/Day±SD | % Increase in Mean ED Visits | P value |
|-------------------|-------------------------|------------|---------------------|-----------------------|------------------------------|---------|
| Winter            | <25 µg/m <sup>3</sup>   | 18         | 9                   | 0.50±0.86             | -26.03%                      | 0.18    |
|                   | ≥25 µg/m <sup>3</sup>   | 73         | 27                  | 0.37±0.70             |                              |         |
| Spring            | <25 µg/m <sup>3</sup>   | 42         | 18                  | 0.43±0.77             | 30.67%                       | 0.41    |
|                   | ≥25 µg/m <sup>3</sup>   | 50         | 28                  | 0.56±0.73             |                              |         |
| Summer            | <25 µg/m <sup>3</sup>   | 74         | 28                  | 0.38±0.66             | -11.90%                      | 0.79    |
|                   | ≥25 µg/m <sup>3</sup>   | 18         | 6                   | 0.33±0.49             |                              |         |
| Autumn            | <25 µg/m <sup>3</sup>   | 54         | 21                  | 0.39±0.60             | 80.69%                       | 0.15    |
|                   | ≥25 µg/m <sup>3</sup>   | 37         | 26                  | 0.70±0.94             |                              |         |
